# Supplementary material for: Drinking made easier: honey bee tongues dip faster into warmer and/or less viscous artificial nectar
Source: Oxford University Press journal article supplement (doi:10.1242/jeb.229799), 2020-01-01
Supplement: jeb229799supp.pdf [file jeb229799supp.pdf]

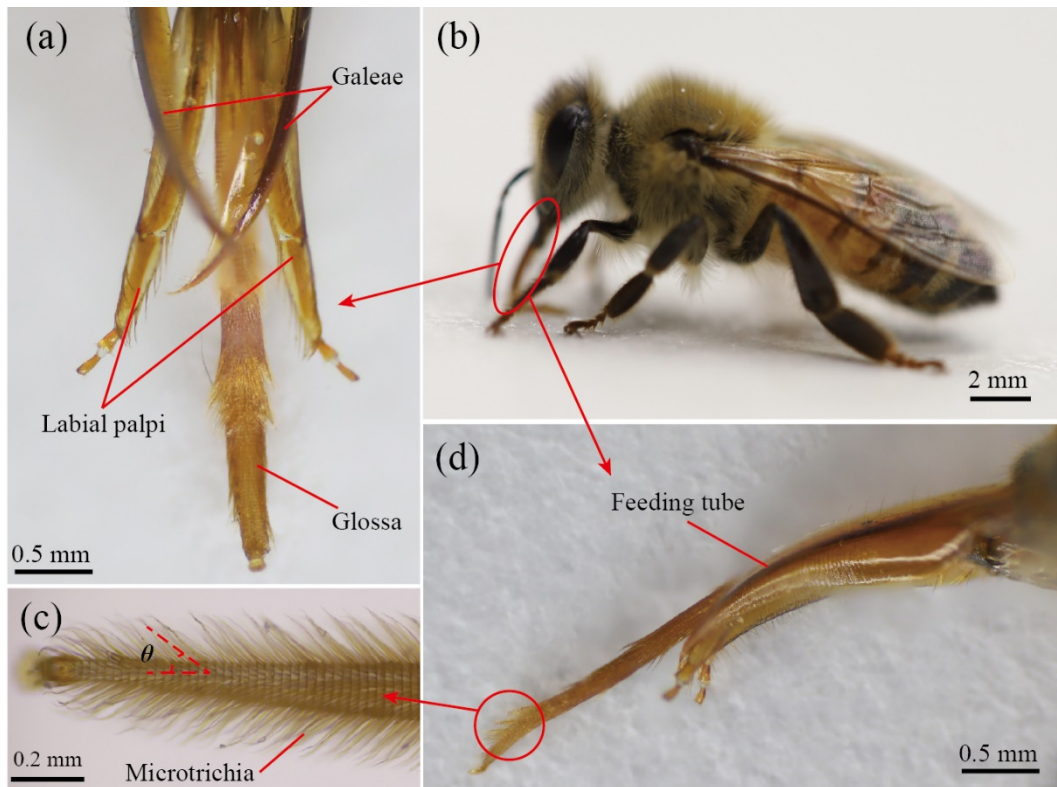

**Fig. S1. Mouthparts of a honey bee.** (a) Mouthparts comprise three main parts: a pair of galeae, a pair of labial palpi and a glossa. Each segment of the glossa bears a ring of long hairs or microtrichia, which expand outwards as the glossa is extended into nectar. (b) Image of a feeding worker honey bee. (c) The glossal hairs are unfolding under the microscope, and their erection angle is  $\theta$ . (d) The galeae and labial palpi form a feeding tube when a honey bee drinks sucrose solution.

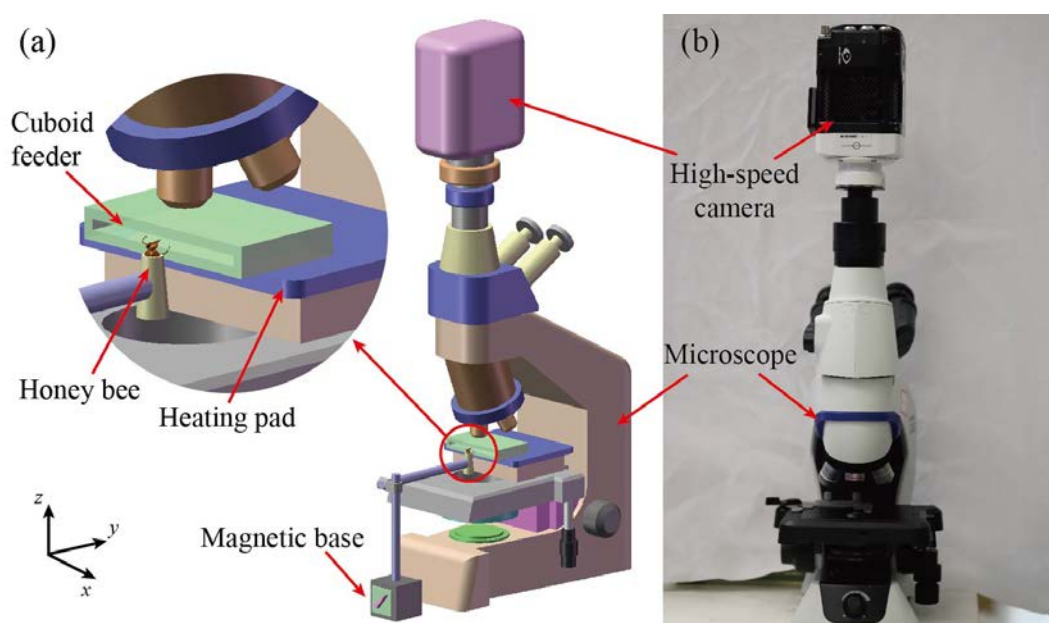

**Fig. S2. Experimental setup for videography of the feeding process of a honey bee.**

The specially designed system consisted of a high-speed camera (Phantom, Miro LC310, USA), a microscope (Olympus, CX33, Japan), and a heating pad (Fig. S2). The heating pad (temperature range  $20^{\circ}\text{C} \sim 60^{\circ}\text{C}$ , Smart-M, China) was used to maintain the temperatures of sucrose solutions. We operated this system to record the dipping processes of honey bees. In the experiments with Tylose, a digital viscometer (NDJ-5S, MINCEE, China) was used to measure the viscosity of sucrose solutions. The frame speed was 1000 fps.

(a) At the top-left corner, the enlarged figure shows that the temperature of sucrose solutions is kept constant by the heating pad. The cuboid feeder had 1 mm gap which was filled with sucrose solutions. (b) The movement of the proboscis is magnified by the microscope (5x) and filmed with the high-speed camera.

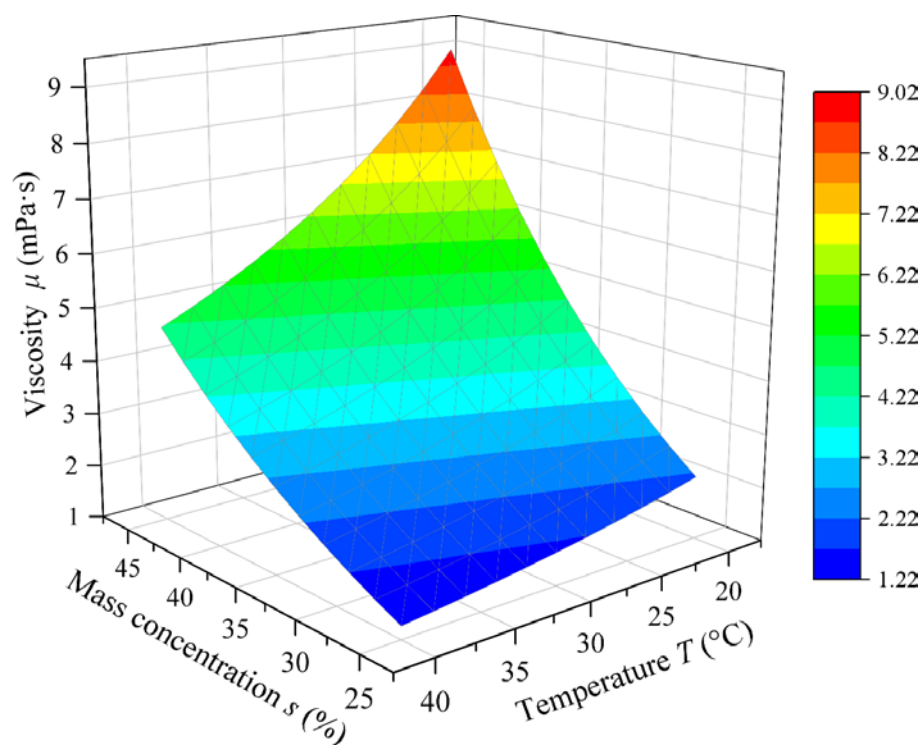

**Fig. S3. Viscosity of sucrose solutions plotted against concentration and temperature.**

We fit the viscosity formula and use the Origin software (Origin2018, OriginLab, USA) to plot a surface graph showing the relationship between viscosity  $\mu$ , concentration  $s$  and temperature  $T$ .

**Table S1. The glossal dipping frequency of honey bees fed different sucrose concentrations at different temperatures ( $n = 10$  dipping cycles selected randomly from 3 videos for each group).**

| Sucrose concentration<br>% w/w | Temperature<br>(°C) | Dipping frequency (Hz) |      |      |      |      |      |      |      |      |      |
|--------------------------------|---------------------|------------------------|------|------|------|------|------|------|------|------|------|
|                                |                     |                        |      |      |      |      |      |      |      |      |      |
| 25                             | 20                  | 5.10                   | 4.95 | 4.90 | 5.10 | 4.76 | 4.90 | 4.95 | 5.13 | 5.41 | 4.95 |
|                                | 25                  | 5.10                   | 5.21 | 4.67 | 5.75 | 6.13 | 4.85 | 4.83 | 5.38 | 6.06 | 4.88 |
|                                | 30                  | 5.85                   | 5.85 | 5.81 | 6.02 | 5.68 | 5.92 | 6.06 | 5.75 | 5.99 | 5.88 |
|                                | 35                  | 5.88                   | 6.25 | 6.62 | 6.25 | 6.02 | 5.92 | 6.49 | 6.37 | 6.29 | 5.85 |
|                                | 40                  | 6.17                   | 7.25 | 7.41 | 7.46 | 6.80 | 7.35 | 6.54 | 7.58 | 6.80 | 7.25 |
| 30                             | 20                  | 4.55                   | 4.63 | 4.59 | 4.15 | 5.52 | 4.12 | 5.52 | 4.85 | 5.99 | 5.88 |
|                                | 25                  | 4.90                   | 6.02 | 4.55 | 5.21 | 4.85 | 5.00 | 5.92 | 5.38 | 4.55 | 4.69 |
|                                | 30                  | 5.56                   | 6.25 | 6.17 | 6.62 | 5.35 | 6.10 | 5.43 | 5.41 | 5.32 | 6.06 |
|                                | 35                  | 5.75                   | 5.68 | 5.71 | 6.25 | 5.59 | 5.78 | 5.68 | 6.94 | 6.94 | 6.80 |
|                                | 40                  | 6.94                   | 7.09 | 6.41 | 6.62 | 7.25 | 6.71 | 7.46 | 6.54 | 6.71 | 6.58 |
| 35                             | 20                  | 5.03                   | 4.52 | 4.69 | 5.08 | 4.90 | 4.02 | 4.85 | 4.88 | 4.33 | 5.13 |
|                                | 25                  | 4.78                   | 5.05 | 5.18 | 4.81 | 4.81 | 4.78 | 5.05 | 5.46 | 4.95 | 4.98 |
|                                | 30                  | 6.17                   | 5.75 | 5.75 | 5.49 | 5.62 | 5.59 | 5.65 | 6.13 | 5.43 | 6.10 |
|                                | 35                  | 5.81                   | 6.25 | 6.10 | 6.25 | 6.17 | 6.02 | 6.06 | 5.85 | 6.29 | 6.17 |

|    |    |      |      |      |      |      |      |      |      |      |      |
|----|----|------|------|------|------|------|------|------|------|------|------|
|    | 40 | 5.92 | 6.54 | 6.49 | 6.71 | 7.41 | 6.99 | 6.94 | 6.21 | 6.49 | 6.54 |
| 40 | 20 | 4.98 | 5.03 | 4.67 | 4.48 | 4.50 | 4.67 | 4.46 | 4.20 | 4.61 | 4.88 |
|    | 25 | 4.65 | 4.76 | 4.74 | 4.95 | 5.49 | 4.61 | 4.52 | 5.08 | 4.69 | 5.00 |
|    | 30 | 5.78 | 5.78 | 5.88 | 5.71 | 5.03 | 5.78 | 5.81 | 5.46 | 5.52 | 5.92 |
|    | 35 | 6.54 | 6.67 | 5.38 | 5.05 | 5.85 | 5.38 | 6.10 | 5.81 | 5.68 | 5.81 |
|    | 40 | 6.41 | 6.17 | 5.99 | 6.17 | 6.21 | 6.76 | 6.41 | 7.09 | 6.49 | 5.92 |
| 45 | 20 | 5.32 | 5.43 | 4.37 | 4.95 | 4.26 | 4.10 | 3.91 | 4.17 | 3.89 | 4.08 |
|    | 25 | 4.29 | 4.90 | 5.05 | 4.55 | 4.88 | 4.93 | 4.65 | 5.08 | 4.41 | 4.55 |
|    | 30 | 4.83 | 5.38 | 4.95 | 6.06 | 5.15 | 4.95 | 5.00 | 5.15 | 6.49 | 4.95 |
|    | 35 | 6.06 | 5.56 | 6.17 | 5.78 | 5.56 | 5.08 | 5.38 | 5.26 | 5.88 | 5.59 |
|    | 40 | 6.67 | 5.95 | 6.41 | 6.25 | 6.49 | 6.49 | 5.85 | 5.92 | 5.81 | 6.33 |

**Table S2. The glossal dipping frequency of honey bees fed different sucrose concentrations at constant viscosity ( $n = 10$  dipping cycles selected randomly from 3 videos for each group).**

| Temperature (°C) | Sucrose concentration % w/w | Viscosity (mPa·s) | Dipping frequency (Hz) |      |      |      |      |      |      |      |      |      |
|------------------|-----------------------------|-------------------|------------------------|------|------|------|------|------|------|------|------|------|
|                  |                             |                   |                        |      |      |      |      |      |      |      |      |      |
| 25               | 25                          | 7.2               | 4.93                   | 4.27 | 5.05 | 5.00 | 5.13 | 4.76 | 4.55 | 4.42 | 4.48 | 4.69 |
|                  | 30                          | 7.2               | 4.46                   | 4.65 | 4.93 | 5.08 | 4.44 | 4.95 | 4.93 | 4.61 | 4.74 | 4.50 |
|                  | 35                          | 7.2               | 4.78                   | 4.74 | 4.46 | 5.15 | 4.42 | 4.95 | 4.98 | 4.57 | 4.67 | 4.57 |
|                  | 40                          | 7.2               | 4.81                   | 4.69 | 4.48 | 4.59 | 5.10 | 4.90 | 4.85 | 4.57 | 4.46 | 4.83 |
|                  | 45                          | 7.2               | 4.46                   | 4.90 | 5.05 | 5.03 | 4.88 | 4.93 | 4.98 | 4.29 | 3.89 | 4.90 |

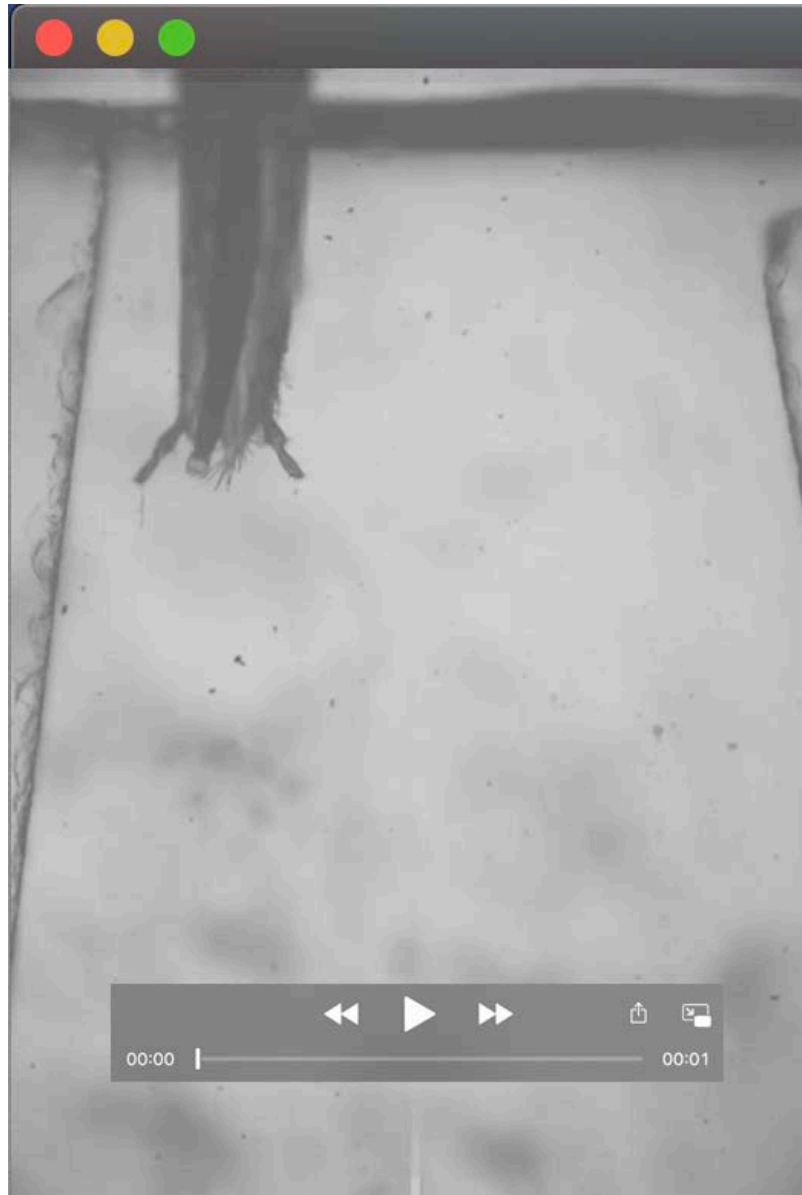

Movie 1. The honey bee dips 40% nectar at 25°C.

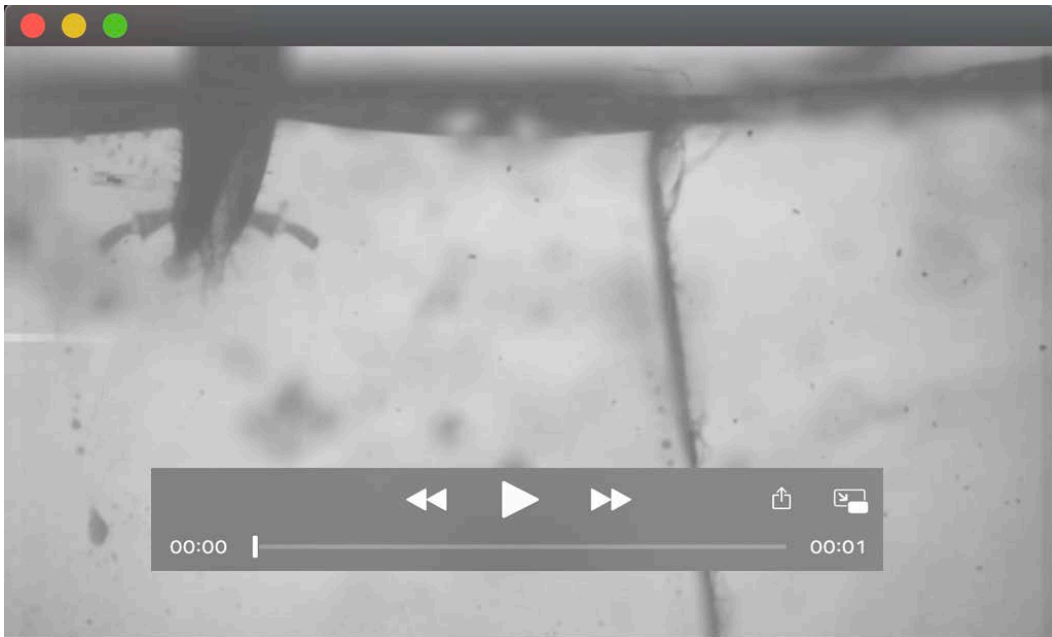

Movie 2. The honey bee dips 45% nectar at 25°C.
